# Supplementary material for: Role of conductive binder to direct solid–electrolyte interphase formation over silicon anodes
Source: Royal Society of Chemistry journal article supplement (doi:10.1039/c9cp02610j), 2019-01-01
Supplement: c9cp02610j1.pdf [file c9cp02610j1.pdf]

## Supplemental

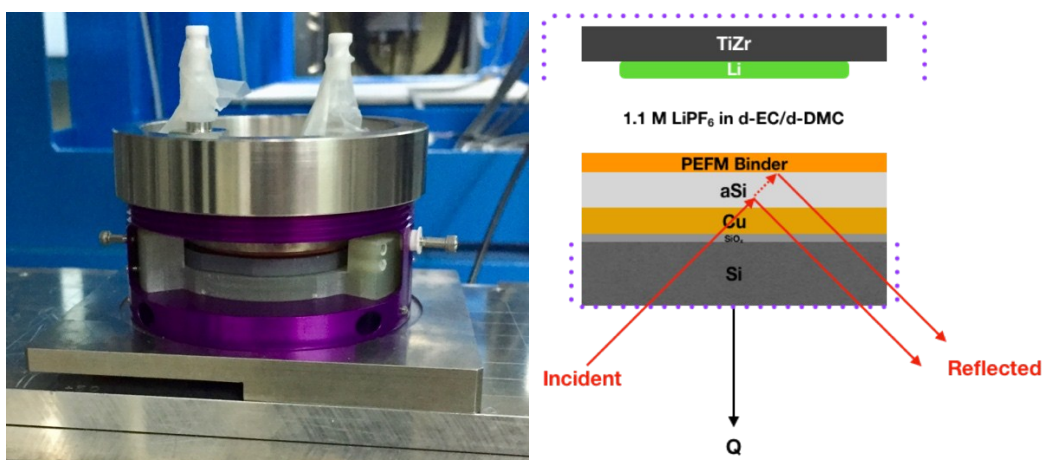

**Figure S1.** The electrochemical cell used for the *in situ* NR experiment and scattering geometry through the cell.

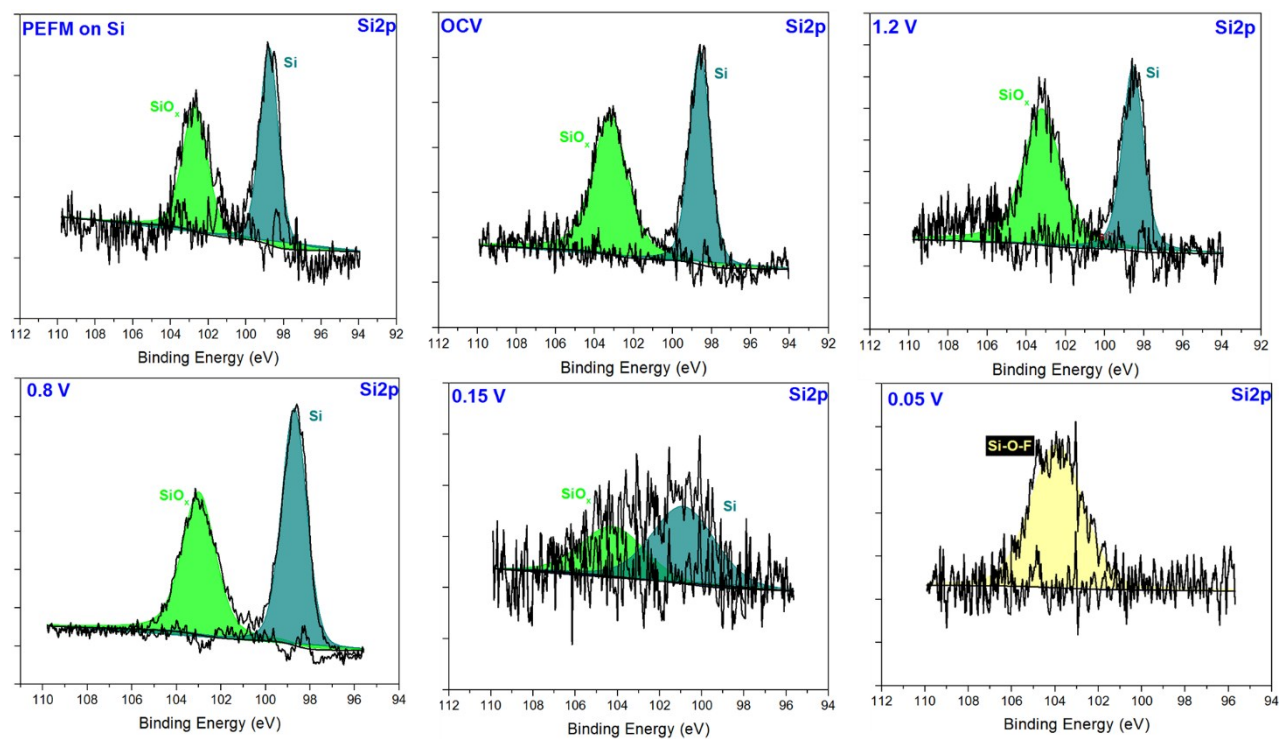

**Figure S2.** XPS results for Si2p spectra

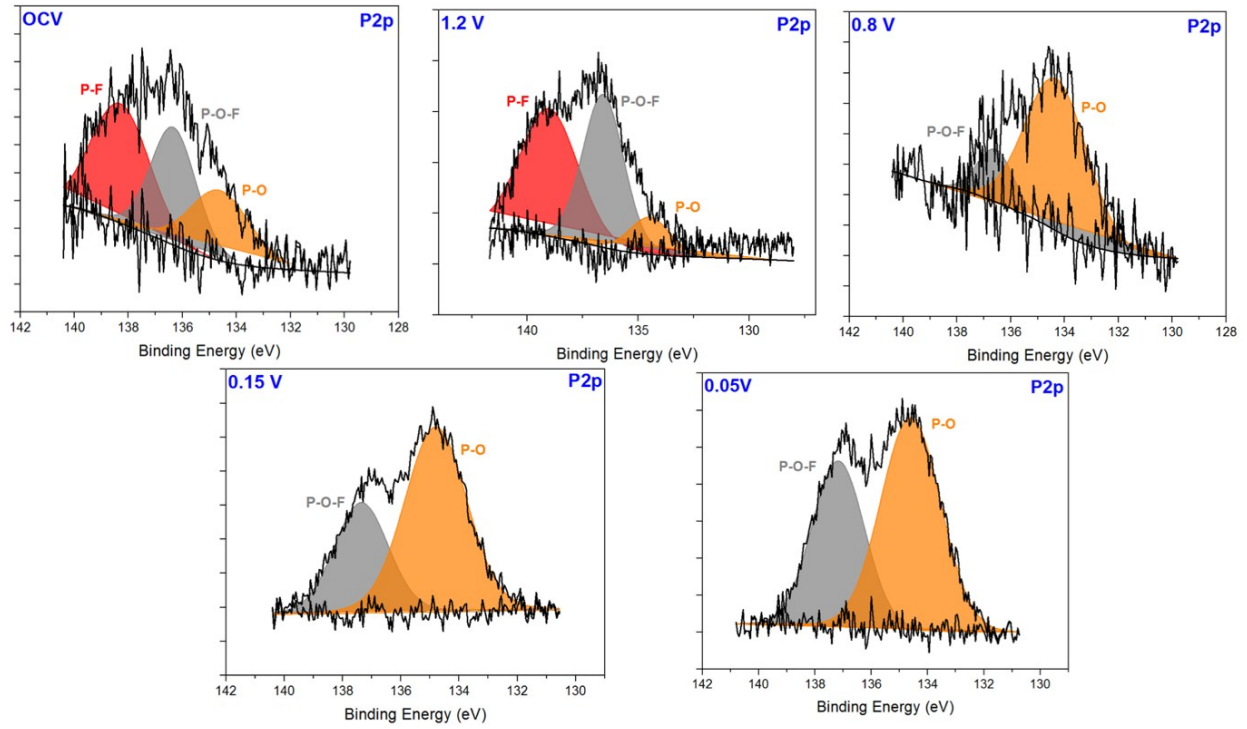

**Figure S3.** XPS results for P2p spectra

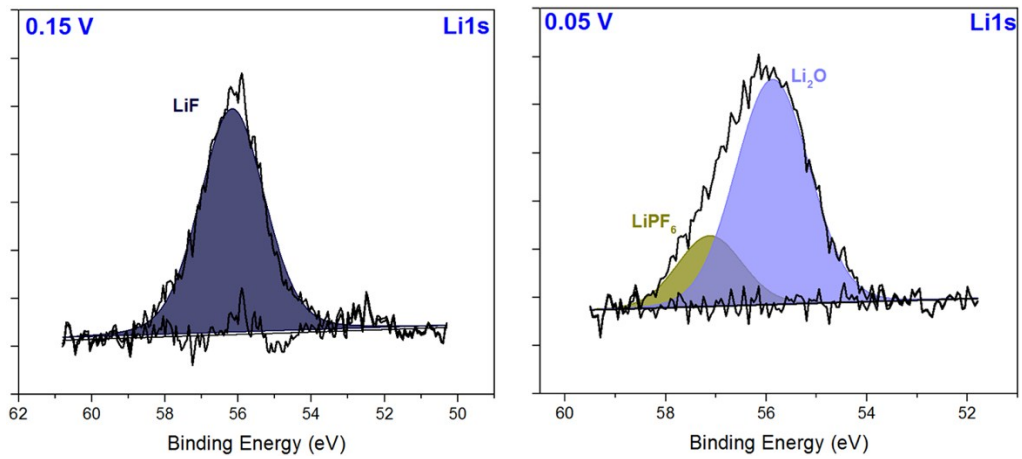

**Figure S4.** XPS results for Li1s spectra

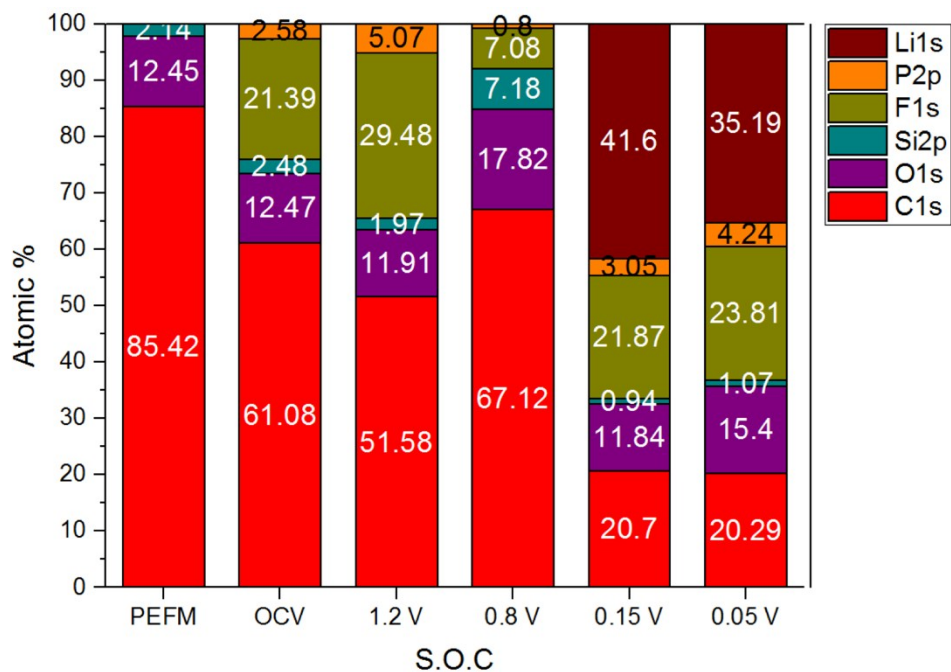

Figure S5. Atomic percent of XPS witness samples

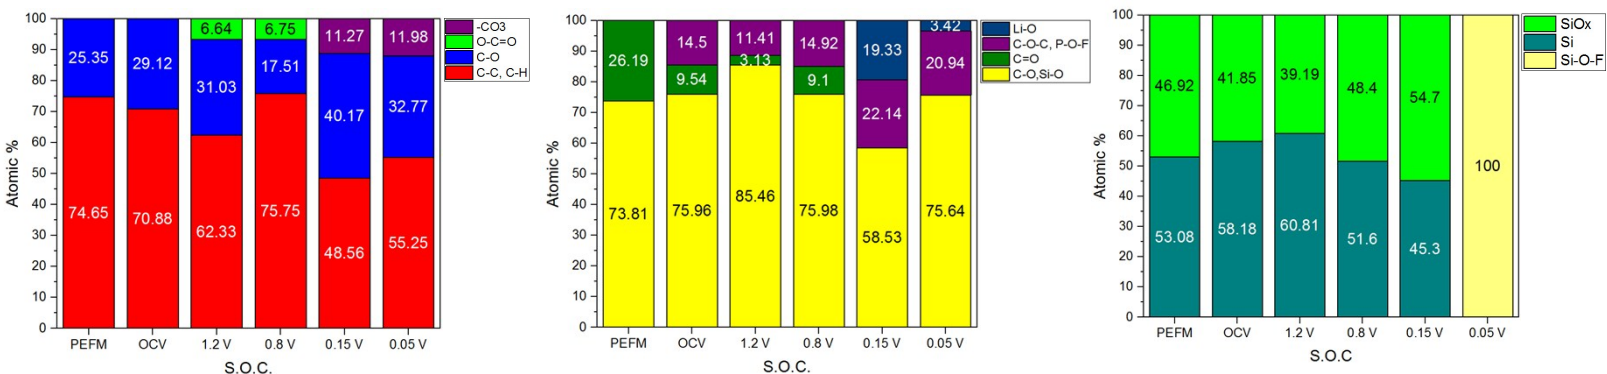

Figure S6. Atomic percent from fits of XPS witness samples

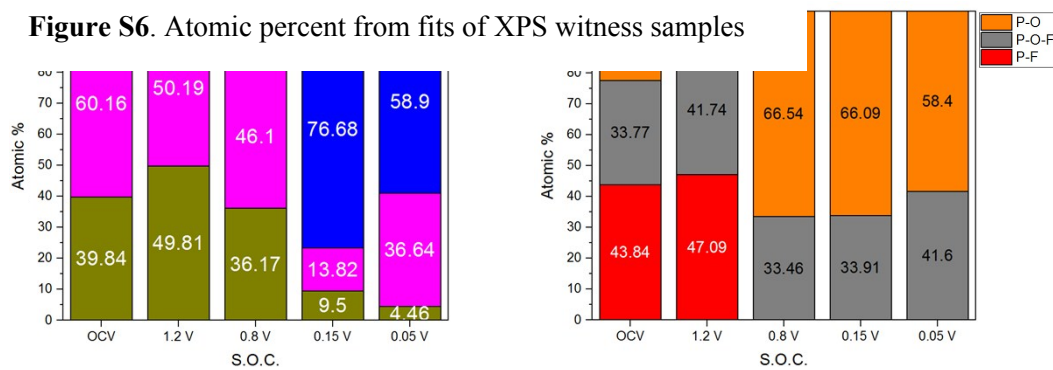

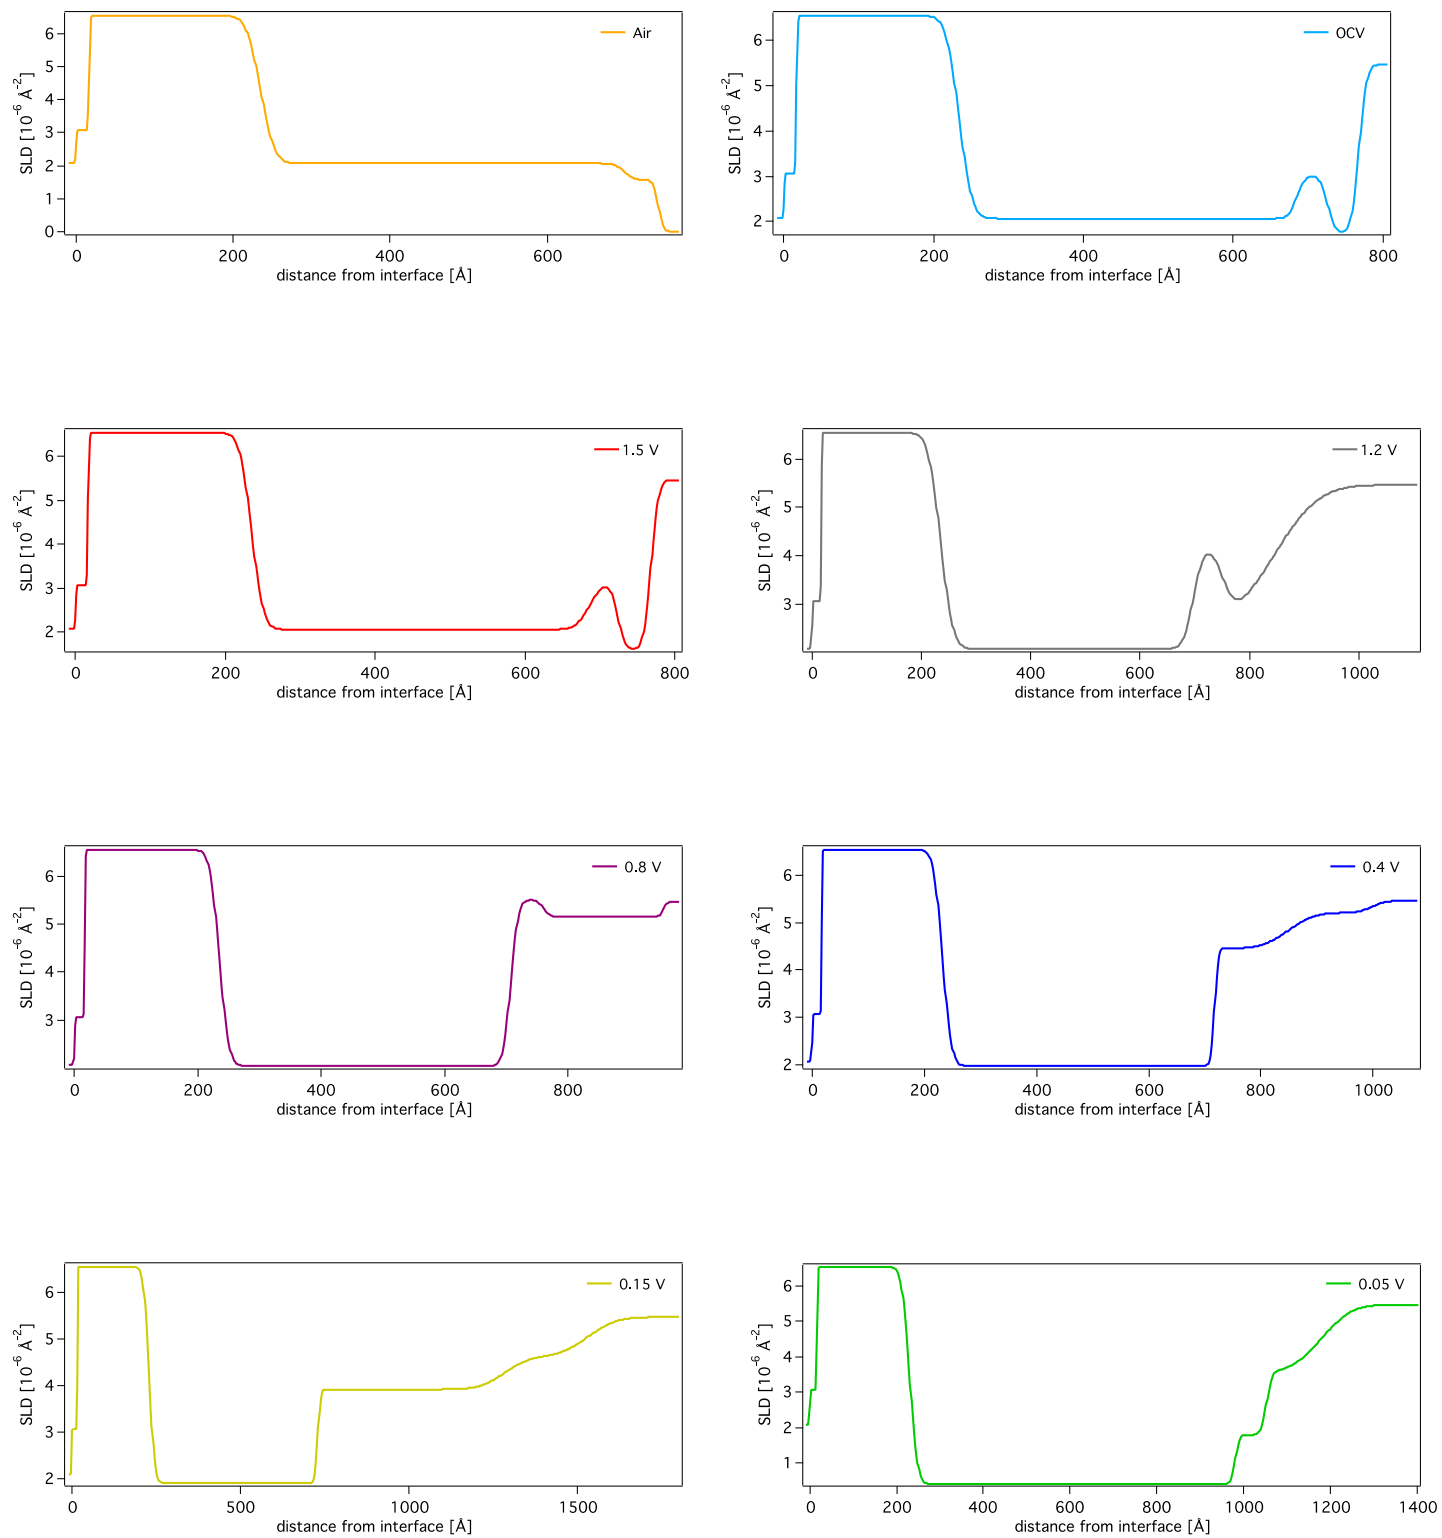

**Figure S7.** Individual SLD depth profiles for each state of charge.
